# Supplementary material for: Interactions between Aβ and Mutated Tau Lead to Polymorphism and Induce Aggregation of Aβ-Mutated Tau Oligomeric Complexes
Source: PubMed Central journal article supplement (PMC3741189; doi:10.1371/journal.pone.0073303), 2013-08-12
Supplement: pone.0073303.s018.pdf [file pone.0073303.s018.pdf]

**Table S1:** The conformational energies (computed using the GBMV calculations) and the populations of models H1-H7 and model J1-J7.

| <b>Model</b> | <b>Conformational energy<br/>(kcal/mol)</b> | <b>Population (%)</b> | <b>Standard<br/>deviation<br/>(kcal/mol)</b> |
|--------------|---------------------------------------------|-----------------------|----------------------------------------------|
| J1           | -6412.25                                    | 6.4                   | 147.02                                       |
| J2           | -6472.78                                    | 7.5                   | 150.17                                       |
| J3           | -6375.49                                    | 5.0                   | 146.39                                       |
| J4           | -6526.12                                    | 8.8                   | 147.31                                       |
| J5           | -6455.26                                    | 6.9                   | 141.90                                       |
| J6           | -6547.89                                    | 9.4                   | 148.53                                       |
| J7           | -6400.71                                    | 5.6                   | 153.30                                       |
| H1           | -6389.40                                    | 5.2                   | 142.40                                       |
| H2           | -6438.53                                    | 6.6                   | 148.66                                       |
| H3           | -6324.98                                    | 3.8                   | 151.30                                       |
| H4           | -6487.32                                    | 7.3                   | 153.85                                       |
| H5           | -6571.71                                    | 9.9                   | 147.76                                       |
| H6           | -6564.15                                    | 9.8                   | 150.53                                       |
| H7           | -6468.06                                    | 7.9                   | 140.22                                       |
