# Supplementary material for: Interactions between Aβ and Mutated Tau Lead to Polymorphism and Induce Aggregation of Aβ-Mutated Tau Oligomeric Complexes
Source: PubMed Central journal article supplement (PMC3741189; doi:10.1371/journal.pone.0073303), 2013-08-12
Supplement: pone.0073303.s019.pdf [file pone.0073303.s019.pdf]

**Table S2:** The averaged inter-sheet (C $\alpha$  backbone-backbone) distances measured in the last 5 ns of the MD simulations for models H1-H7 and models J1-J7.

| <b>Model</b> | <b>Tau<br/>backbone-<br/>backbone<br/>distance [Å]</b> | <b>A<math>\beta</math><br/>backbone-<br/>backbone<br/>distance [Å]</b> | <b>A<math>\beta</math>-Tau<br/>backbone-<br/>backbone<br/>distance [Å]</b> |
|--------------|--------------------------------------------------------|------------------------------------------------------------------------|----------------------------------------------------------------------------|
| J1           | 19.6                                                   | 13.3                                                                   | 17.2                                                                       |
| J2           | 17.1                                                   | 14.0                                                                   | 15.4                                                                       |
| J3           | 20.5                                                   | 19.0                                                                   | 19.4                                                                       |
| J4           | 22.5                                                   | 18.1                                                                   | -                                                                          |
| J5           | 21.8                                                   | 16.8                                                                   | -                                                                          |
| J6           | 22.3                                                   | 12.7                                                                   | -                                                                          |
| J7           | 21.0                                                   | 17.3                                                                   | -                                                                          |
| H1           | 16.4                                                   | 14.4                                                                   | 11.1                                                                       |
| H2           | 16.4                                                   | 13.3                                                                   | 14.3                                                                       |
| H3           | 14.5                                                   | 14.1                                                                   | 14.4                                                                       |
| H4           | 15.8                                                   | 14.2                                                                   | -                                                                          |
| H5           | 15.3                                                   | 13.0                                                                   | -                                                                          |
| H6           | 15.3                                                   | 14.5                                                                   | -                                                                          |
| H7           | 20.5                                                   | 11.2                                                                   | -                                                                          |
