# Supplementary material for: Interactions between Aβ and Mutated Tau Lead to Polymorphism and Induce Aggregation of Aβ-Mutated Tau Oligomeric Complexes
Source: PubMed Central journal article supplement (PMC3741189; doi:10.1371/journal.pone.0073303), 2013-08-12
Supplement: pone.0073303.s020.pdf [file pone.0073303.s020.pdf]

**Table S3:** The conformational energies (computed using the GBMV calculations) and the populations of wild-type (WT) Tau R2 repeat oligomer, the mutated tau M1 and M2 models and A $\beta_{17-42}$  oligomer.

| <b>Model</b>                       | <b>GBMV average energy [kcal/mol]</b> | <b>Standard Deviaton [kcal/mol]</b> |
|------------------------------------|---------------------------------------|-------------------------------------|
| <b>WT Tau R2 repeat</b>            | -4881.49                              | 99.85                               |
| <b>M1</b>                          | -4618.03                              | 94.06                               |
| <b>M2</b>                          | -4349.05                              | 87.18                               |
| <b>A<math>\beta_{17-42}</math></b> | -1845.66                              | 77.55                               |
